# Supplementary material for: Haplotype Reconstruction Error as a Classical Misclassification Problem: Introducing Sensitivity and Specificity as Error Measures
Source: PLoS One. 2008 Mar 26;3(3):e1853. doi: 10.1371/journal.pone.0001853 (PMC2267219; doi:10.1371/journal.pone.0001853)
Supplement: Appendix S1 — Analytical approach to quantify the error rate, sensitivity and specificity (0.12 MB DOC) [file pone.0001853.s001.doc]

# Appendix S1:

Analytical Approach to quantify the error rate, sensitivity and specificity

**Error rate**

Theprobability that the haplotype pair of individual *i* is correctly inferred, , can be written as

(1).

We can write . Since depends only on *Gi*,the first factor reduces to and the second factor equals unity since *Gi* is uniquely defined by the haplotype pair *Hi*. Thus, with being the sum over all possible haplotype pairs **which are consistent with γ, , (1) can be restated as

(2).

The among all that maximize will be denoted by , which is assigned as the most likely haplotype pair to given the genotype. Thus, and for other , and (2) reduces to

(3).

or written alternatively as . With denoting the probability of a subject having haplotype pair , this becomes . is given by = for or = otherwise, when depicts the haplotype pair hj/hk. If the reconstructed haplotype frequencies, , can be assumed to approximate the true haplotype frequencies (i.e. the haplotype-specific discrepancy is small), an approximation of the error rate is thus given by

**Sensitivity and specificity**

For each haplotype *hm*, *m*=1,…,*M*, the sensitivity and the specificity are defined as and , respectively. The sensitivity can be rewritten as

(4).

The numerator of (4) can be computed as , which we separate into two sums , and due to being zero, we yield

(5).

With Bayes’ Formula, we get . We then apply the same deduction as from (1) to (3), but restricting the sum to a sum of , which yield such that the *m*th component of is > 0. Then (5) can be restated as

(6),

and the sensitivity can be derived as

and the specificity, analogously, as

.

**Computing the error rate from sensitivity and specificity**

In order to describe the error rate by and , the sum is partitioned into and . With (4) and (5) ,we obtain and , and thus

.
